# Supplementary material for: Expanding the gelation properties of valine-based 3,5-diaminobenzoate organogelators with N-alkylurea functionalities
Source: publisher site journal article supplement (doi:10.3762/bjoc.6.114), 2010-10-26
Supplement: Additional file 1 [file 1860-5397-6-114-S1.pdf]

# Supporting Information

for

## Expanding the gelation properties of valine-based 3,5-diaminobenzoate organogelators with *N*-alkylurea functionalities

Hak-Fun Chow\*<sup>1,2,3</sup> and Chin-Ho Cheng<sup>1</sup>

<sup>1</sup>Department of Chemistry, The Chinese University of Hong Kong, Shatin, NT, Hong Kong SAR, <sup>2</sup>The Center of Novel Functional Molecules, The Chinese University of Hong Kong, Shatin, NT, Hong Kong SAR and <sup>3</sup>Institute of Molecular Functional Materials, Areas of Excellence Scheme, University Grants Committee, Hong Kong SAR

Email: Hak-Fun Chow - hfchow@cuhk.edu.hk

\* Corresponding author

**General procedure, yields and characterization data of compounds 6 ( $n = 3-20$ ).**

**General procedure for the preparation of *O*-succinimidyl alkylcarbamates **6**.** A mixture of EtOCOCl (11.5 mL, 0.12 mol) and *N*-methyl morpholine (NMM) (13.2 mL, 0.12 mol) was added to a THF solution (250 mL) of the carboxylic acid **5** (0.10 mol). The reaction mixture was stirred at  $-20\text{ }^{\circ}\text{C}$  for 30 min. An aqueous  $\text{NaN}_3$  solution (16.3 g in 100 mL water, 0.25 mol) was then added and the mixture stirred under a nitrogen atmosphere at  $-5\text{ }^{\circ}\text{C}$  for 15 min. The reaction mixture was extracted with EtOAc (100 mL  $\times$  3) and the combined organic layers were washed with saturated NaCl solution (100 mL), dried ( $\text{MgSO}_4$ ), filtered and concentrated in vacuo. The crude reaction product was then heated in toluene (100 mL) at  $65\text{ }^{\circ}\text{C}$  for 30 min until gas evolution ceased. Solid *N*-hydroxysuccinimide (11.5 g, 0.10 mol) and pyridine (8.1 mL, 0.10 mol) were added successively and the reaction mixture was stirred for 2 h at room temperature. The product was precipitated in hexane/EtOAc (2/1), filtered and washed with diethyl ether (100 mL). Compounds **6** were obtained as crystalline solids after flash chromatography (hexane/EtOAc = 1/1).

***O*-Succinimidyl butylcarbamate (**6**,  $n = 3$ ).** Starting from pentanoic acid (10.2 g, 0.10 mol), the product was obtained as a white solid (18.3 g, 85%).  $R_f$  0.40 (hexane/EtOAc = 1/1). mp  $71\text{--}72\text{ }^{\circ}\text{C}$ .  $^1\text{H}$  NMR ( $\text{CDCl}_3$ ):  $\delta$  0.93 (3 H, t,  $J = 6.0$ ,  $\text{CH}_2\text{CH}_3$ ), 1.33–1.59 (4 H, m, aliphatic  $H$ ), 2.82 (4 H, s,  $\text{COCH}_2$ ), 3.24 (2 H, q,  $J = 7.0$ ,  $\text{NHCH}_2\text{CH}_2$ ), 5.36 (1 H, s,  $\text{CONH}$ ).  $^{13}\text{C}$  NMR ( $\text{CDCl}_3$ ):  $\delta$  13.6, 19.7, 25.4, 31.4, 41.7, 151.6, 170.6. MS (FAB) 215 ( $\text{M} + \text{H}^+$ , 45%). HRMS (L SIMS): calcd for  $\text{C}_9\text{H}_{14}\text{N}_2\text{O}_4$ , 215.1026; found, 215.1030. Anal. found: C, 50.55; H, 6.64; N, 13.01.  $\text{C}_9\text{H}_{14}\text{N}_2\text{O}_4$  requires C, 50.46; H, 6.59; N, 13.07.

***O*-Succinimidyl pentylcarbamate (**6**,  $n = 4$ ).** Starting from hexanoic acid (11.6 g, 0.10 mol), the product was obtained as a white solid (19.3 g, 84%).  $R_f$  0.42 (hexane/EtOAc = 1/1). mp  $74\text{--}$

75 °C.  $^1\text{H}$  NMR ( $\text{CDCl}_3$ ):  $\delta$  0.90 (3 H, t,  $J = 7.5$ ,  $\text{CH}_2\text{CH}_3$ ), 1.30–1.59 (6 H, m, aliphatic  $H$ ), 2.82 (4 H, s,  $\text{COCH}_2$ ), 3.25 (2 H, q,  $J = 7.0$ ,  $\text{NHCH}_2\text{CH}_2$ ), 5.24 (1 H, s,  $\text{CONH}$ ).  $^{13}\text{C}$  NMR ( $\text{CDCl}_3$ ):  $\delta$  13.8, 22.1, 25.4, 28.6, 28.9, 41.9, 151.5, 170.6. MS (FAB) 229 ( $M + \text{H}^+$ , 25%). HRMS (L SIMS): calcd for  $\text{C}_{10}\text{H}_{16}\text{N}_2\text{O}_4$ , 229.1183; found, 229.1175. Anal. found: C, 52.49; H, 7.05; N, 12.16.  $\text{C}_{10}\text{H}_{16}\text{N}_2\text{O}_4$  requires C, 52.62; H, 7.07; N, 12.27.

***O*-Succinimidyl hexylcarbamate (6,  $n = 5$ ).** Starting from heptanoic acid (13.0 g, 0.10 mol), the product was obtained as a white solid (20.4 g, 84%).  $R_f$  0.43 (hexane/EtOAc = 1/1). mp 76–77 °C.  $^1\text{H}$  NMR ( $\text{CDCl}_3$ ):  $\delta$  0.89 (3 H, t,  $J = 6.0$ ,  $\text{CH}_2\text{CH}_3$ ), 1.20–1.50 (8 H, m, aliphatic  $H$ ), 2.81 (4 H, s,  $\text{COCH}_2$ ), 3.23 (2 H, q,  $J = 7.0$ ,  $\text{NHCH}_2\text{CH}_2$ ), 5.68 (1 H, s,  $\text{CONH}$ ).  $^{13}\text{C}$  NMR ( $\text{CDCl}_3$ ):  $\delta$  14.1, 22.6, 25.6, 26.4, 29.5, 31.4, 42.2, 151.5, 170.2. MS (FAB) 243 ( $M + \text{H}^+$ , 25%). HRMS (L SIMS): calcd for  $\text{C}_{11}\text{H}_{18}\text{N}_2\text{O}_4$ , 243.1339; found, 243.1348. Anal. found: C, 54.50; H, 7.53; N, 11.48.  $\text{C}_{11}\text{H}_{18}\text{N}_2\text{O}_4$  requires C, 54.53; H, 7.49 ; N, 11.56.

***O*-Succinimidyl heptylcarbamate (6,  $n = 6$ ).** Starting from octanoic acid (14.4 g, 0.10 mol), the product was obtained as a white solid (21.6 g, 85%).  $R_f$  0.43 (hexane/EtOAc = 1/1). mp 78–79 °C.  $^1\text{H}$  NMR ( $\text{CDCl}_3$ ):  $\delta$  0.89 (3 H, t,  $J = 6.0$ ,  $\text{CH}_2\text{CH}_3$ ), 1.28 (8 H, m, aliphatic  $H$ ), 1.53 (2 H, q,  $J = 7.0$ , aliphatic  $H$ ), 2.81 (4 H, s,  $\text{COCH}_2$ ), 3.22 (2 H, q,  $J = 7.0$ ,  $\text{NHCH}_2\text{CH}_2$ ), 5.63 (1 H, s,  $\text{CONH}$ ).  $^{13}\text{C}$  NMR ( $\text{CDCl}_3$ ):  $\delta$  14.0, 22.5, 25.4, 25.5, 26.3, 29.4, 31.3, 42.1, 151.6, 170.6. MS (FAB) 257 ( $M + \text{H}^+$ , 35%). HRMS (L SIMS): calcd for  $\text{C}_{12}\text{H}_{20}\text{N}_2\text{O}_4$ , 257.1469; found, 257.1507. Anal. found: C, 56.22; H, 8.02; N, 10.75.  $\text{C}_{12}\text{H}_{20}\text{N}_2\text{O}_4$  requires C, 56.24; H, 7.86; N, 10.92.

***O*-Succinimidyl decylcarbamate (6,  $n = 9$ ).** Starting from undecanoic acid (18.6 g, 0.10 mol), the product was obtained as a white solid (23.9 g, 80%).  $R_f$  0.46 (hexane/EtOAc = 1/1). mp 81–

82 °C.  $^1\text{H}$  NMR ( $\text{CDCl}_3$ ):  $\delta$  0.88 (3 H, t,  $J = 6.0$ ,  $\text{CH}_2\text{CH}_3$ ), 1.26–1.30 (14 H, m, aliphatic  $H$ ), 1.54–1.56 (2 H, m, aliphatic  $H$ ), 2.82 (4 H, s,  $\text{COCH}_2$ ), 3.25 (2 H, q,  $J = 7.0$ ,  $\text{NHCH}_2\text{CH}_2$ ), 5.21 (1 H, s,  $\text{CONH}$ ).  $^{13}\text{C}$  NMR ( $\text{CDCl}_3$ ):  $\delta$  14.1, 22.7, 25.4, 26.6, 29.2, 29.3, 29.4, 29.5, 29.6, 31.9, 42.0, 151.5, 170.6. MS (FAB) 299 ( $\text{M} + \text{H}^+$ , 25%). HRMS (L SIMS): calcd for  $\text{C}_{15}\text{H}_{26}\text{N}_2\text{O}_4$ , 299.1965; found, 299.1961. Anal. found: C, 60.46; H, 8.96; N, 9.29.  $\text{C}_{15}\text{H}_{26}\text{N}_2\text{O}_4$  requires C, 60.38; H, 8.78; N, 9.38.

***O*-Succinimidyl undecylcarbamate (6,  $n = 10$ ).** Starting from dodecanoic acid (20.0 g, 0.10 mol), the product was obtained as a white solid (24.4 g, 78%).  $R_f$  0.48 (hexane/EtOAc = 1/1). mp 82–83 °C.  $^1\text{H}$  NMR ( $\text{CDCl}_3$ ):  $\delta$  0.82 (3 H, t,  $J = 6.6$ ,  $\text{CH}_2\text{CH}_3$ ), 1.20–1.67 (18 H, m, aliphatic  $H$ ), 2.82 (4 H, s,  $\text{COCH}_2$ ), 3.21 (2 H, q,  $J = 6.4$ ,  $\text{NHCH}_2\text{CH}_2$ ), 6.26 (1 H, s,  $\text{CONH}$ ).  $^{13}\text{C}$  NMR ( $\text{CDCl}_3$ ):  $\delta$  14.2, 22.8, 25.6, 26.7, 29.3, 29.45, 29.55, 29.6, 29.68, 29.74, 32.0, 42.2, 151.5, 170.3. MS (FAB) 313 ( $\text{M} + \text{H}^+$ , 33%). HRMS (L SIMS): calcd for  $\text{C}_{16}\text{H}_{28}\text{N}_2\text{O}_4$ , 313.2122; found, 313.2106. Anal. found: C, 61.39; H, 9.17; N, 8.91.  $\text{C}_{16}\text{H}_{28}\text{N}_2\text{O}_4$  requires C, 61.51; H, 9.03; N, 8.96.

***O*-Succinimidyl tridecylcarbamate (6,  $n = 12$ ).** Starting from tetradecanoic acid (22.8 g, 0.10 mol), the product was obtained as a white solid (26.2 g, 77%).  $R_f$  0.48 (hexane/EtOAc = 1/1). mp 85–86 °C.  $^1\text{H}$  NMR ( $\text{CDCl}_3$ ):  $\delta$  0.88 (3 H, t,  $J = 6.6$ ,  $\text{CH}_2\text{CH}_3$ ), 1.25–1.65 (22 H, m, aliphatic  $H$ ), 2.82 (4 H, s,  $\text{COCH}_2$ ), 3.21 (2 H, q,  $J = 6.6$ ,  $\text{NHCH}_2\text{CH}_2$ ), 5.15 (1 H, s,  $\text{CONH}$ ).  $^{13}\text{C}$  NMR ( $\text{CDCl}_3$ ):  $\delta$  14.2, 22.8, 25.6, 26.7, 29.3, 29.5, 29.55, 29.60, 29.68, 29.74, 32.0, 42.2, 151.5, 170.3. MS (FAB) 341 ( $\text{M} + \text{H}^+$ , 28%). HRMS (L SIMS): calcd for  $\text{C}_{18}\text{H}_{32}\text{N}_2\text{O}_4$ , 341.2435; found, 341.2429. Anal. found: C, 63.50; H, 9.56; N, 8.02.  $\text{C}_{18}\text{H}_{32}\text{N}_2\text{O}_4$  requires C, 63.50; H, 9.47; N, 8.22.

***O*-Succinimidyl hexadecylcarbamate** (**6**,  $n = 15$ ). Starting from heptadecanoic acid (27.0 g, 0.10 mol), the product was obtained as a white solid (30.3 g, 79%).  $R_f$  0.49 (hexane/EtOAc = 1/1). mp 88–89 °C.  $^1\text{H}$  NMR ( $\text{CDCl}_3$ ):  $\delta$  0.88 (3 H, t,  $J = 7.2$ ,  $\text{CH}_2\text{CH}_3$ ), 1.19–1.68 (28 H, m, aliphatic  $H$ ), 2.82 (4 H, s,  $\text{COCH}_2$ ), 3.24 (2 H, q,  $J = 6.7$ ,  $\text{NHCH}_2\text{CH}_2$ ), 5.30 (1 H, s,  $\text{CONH}$ ).  $^{13}\text{C}$  NMR ( $\text{CDCl}_3$ ):  $\delta$  14.2, 22.8, 25.6, 26.7, 29.3, 29.5, 29.6, 29.7, 29.8, 32.0, 42.2, 151.5, 170.2. MS (FAB) 383 ( $\text{M} + \text{H}^+$ , 12%). HRMS (L SIMS): calcd for  $\text{C}_{21}\text{H}_{38}\text{N}_2\text{O}_4$ , 383.2904; found, 383.2914. Anal. found: C, 65.91; H, 10.23; N, 7.19.  $\text{C}_{21}\text{H}_{38}\text{N}_2\text{O}_4$  requires C, 65.94; H, 10.01; N, 7.32.

***O*-Succinimidyl nonadecylcarbamate** (**6**,  $n = 18$ ). Starting from eicosanoic acid (31.2 g, 0.10 mol), the product was obtained as a white solid (32.3 g, 76%).  $R_f$  0.50 (hexane/EtOAc = 1/1). mp 90–92 °C.  $^1\text{H}$  NMR ( $\text{CDCl}_3$ ):  $\delta$  0.88 (3 H, t,  $J = 6.6$ ,  $\text{CH}_2\text{CH}_3$ ), 1.20–1.58 (34 H, m, aliphatic  $H$ ), 2.82 (4 H, s,  $\text{COCH}_2$ ), 3.25 (2 H, q,  $J = 7.8$ ,  $\text{NHCH}_2\text{CH}_2$ ), 5.23 (1 H, s,  $\text{CONH}$ ).  $^{13}\text{C}$  NMR ( $\text{CDCl}_3$ ):  $\delta$  14.3, 22.8, 25.6, 26.7, 29.3, 29.5, 29.6, 29.7, 29.8, 32.1, 42.2, 151.5, 170.1. MS (FAB) 425 ( $\text{M} + \text{H}^+$ , 18%). HRMS (L SIMS): calcd for  $\text{C}_{24}\text{H}_{44}\text{N}_2\text{O}_4$ , 425.3374; found, 425.3358. Anal. found: C, 67.74; H, 10.60; N, 6.44.  $\text{C}_{24}\text{H}_{44}\text{N}_2\text{O}_4$  requires C, 67.89; H, 10.44; N, 6.59.

***O*-Succinimidyl heneicosylcarbamate** (**6**,  $n = 20$ ). Starting from docosanoic acid (33.0 g, 0.10 mol), the product was obtained as a white solid (34.4 g, 76%).  $R_f$  0.50 (hexane/EtOAc = 1/1). mp 92–94 °C.  $^1\text{H}$  NMR ( $\text{CDCl}_3$ ):  $\delta$  0.86 (3 H, t,  $\text{CH}_2\text{CH}_3$ ), 1.18–1.57 (38 H, m, aliphatic  $H$ ), 2.82 (4 H, d,  $\text{COCH}_2$ ), 3.24 (2 H, q,  $J = 6.7$ ,  $\text{NHCH}_2\text{CH}_2$ ), 5.23 (1 H, s,  $\text{NH}$ ).  $^{13}\text{C}$  NMR ( $\text{CDCl}_3$ ):  $\delta$  14.3, 22.8, 25.6, 26.7, 29.3, 29.5, 29.6, 29.7, 29.8, 32.1, 42.3, 151.5, 170.1. MS

(FAB) 453 ( $M + H^+$ , 11%). HRMS (L SIMS): calcd for  $C_{26}H_{48}N_2O_4$ , 453.3698; found, 453.3689.

Anal. found: C, 68.77; H, 10.87; N, 6.03.  $C_{26}H_{48}N_2O_4$  requires C, 68.99; H, 10.69; N, 6.19.
